# Supplementary material
Source: bioRxiv or medRxiv preprint supplement (https://medrxiv.org/highwire/filestream/90332/field_highwire_adjunct_files/0/2020.07.18.20156810-1.pdf)
Supplement: Supplementary file [file 2020.07.18.20156810-1.pdf]

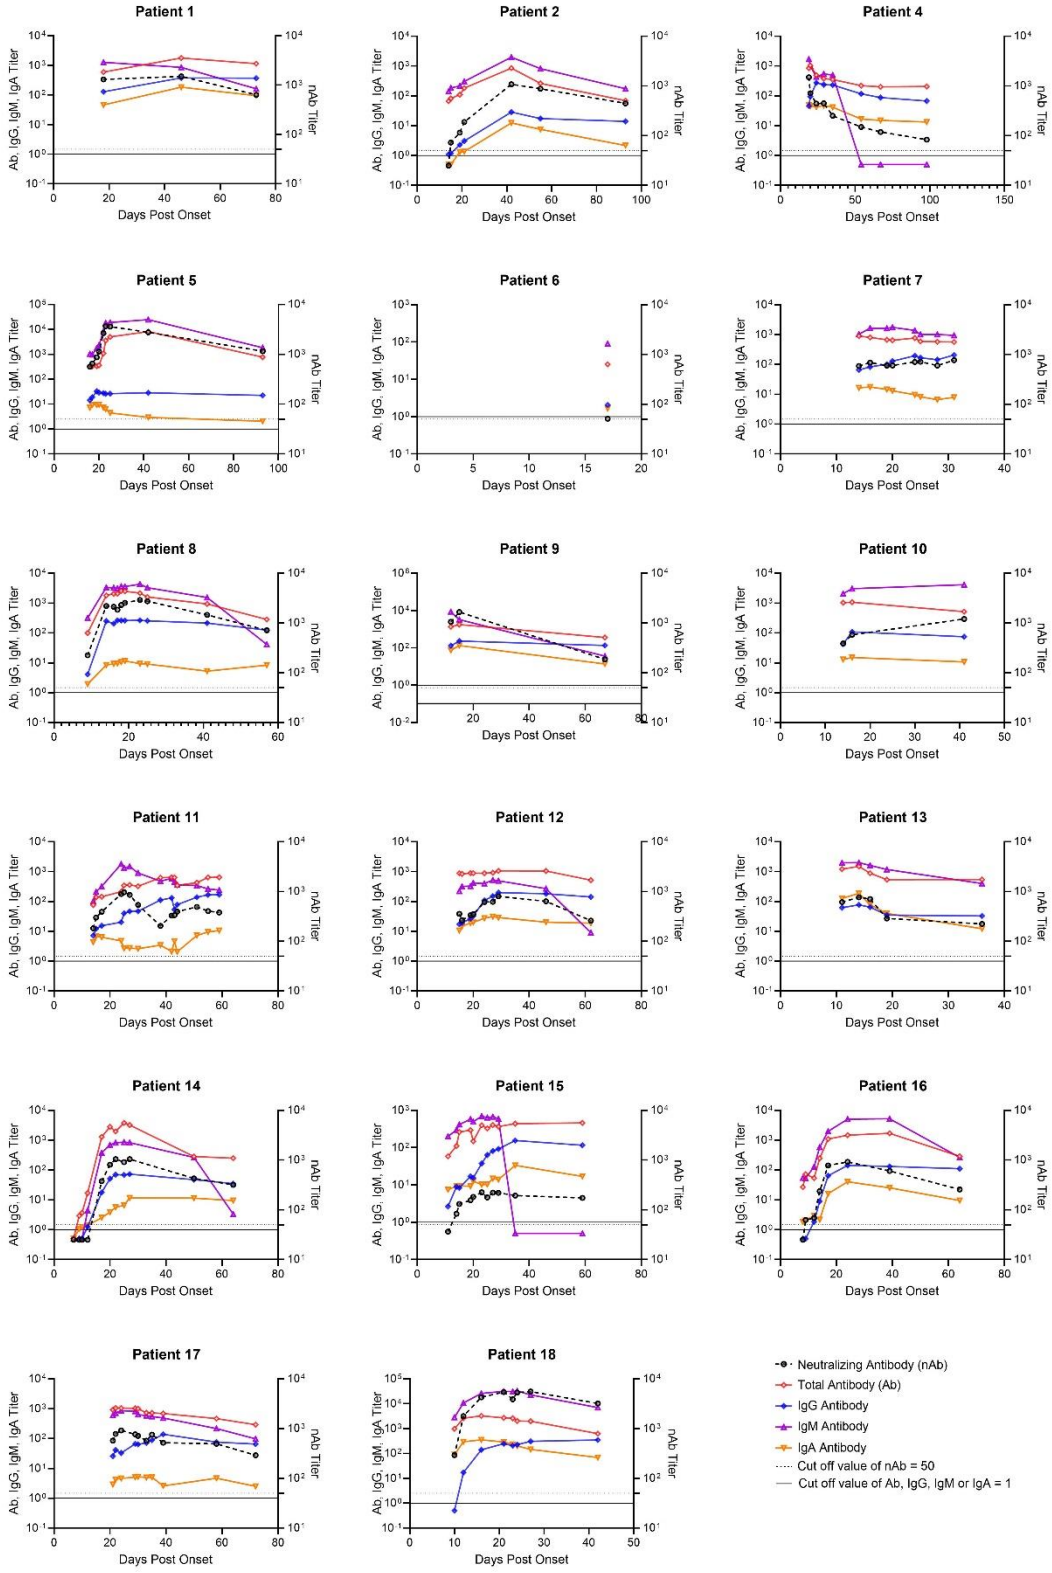

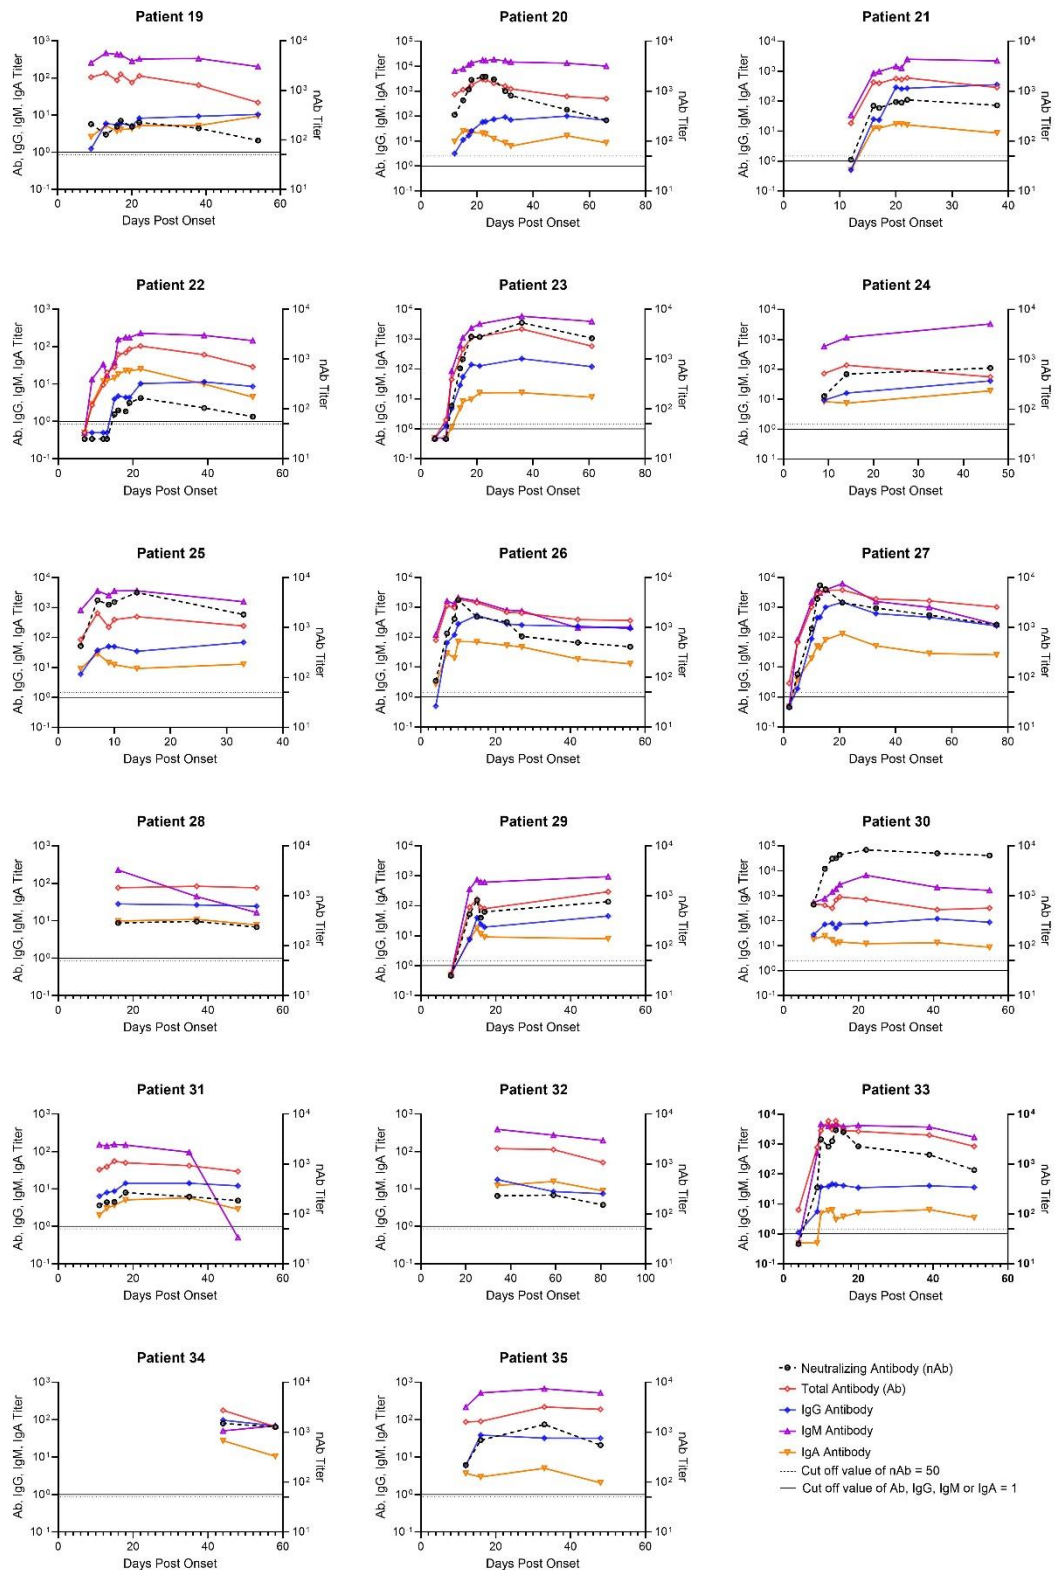

Supplementary Figure 1 Total, IgA, IgM, IgG and neutralizing antibody response for each patient

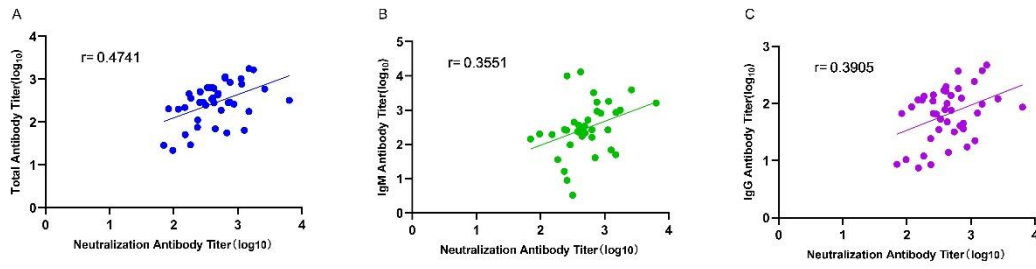

Supplementary Figure 2 Correlation between neutralizing and total (A), IgM (B) and IgG antibodies (C) in samples collected after 6 weeks post onset.

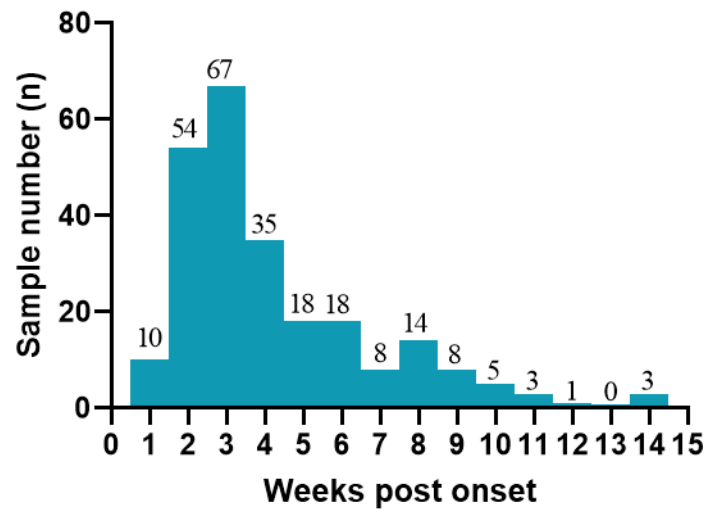

Supplementary Figure 3 Time distribution of samples collection
